# Supplementary material for: Comparative Sequence Analysis of the Non-Protein-Coding Mitochondrial DNA of Inbred Rat Strains
Source: PLoS One. 2009 Dec 7;4(12):e8148. doi: 10.1371/journal.pone.0008148 (PMC2781161; doi:10.1371/journal.pone.0008148)
Supplement: Table S2 — Variable positions in the rat non-protein-coding mtDNA (0.06 MB XLS) [file pone.0008148.s002.xls]

## Sheet: Variable sites
Table S2
Variable positions in the rat non-protein-coding mtDNA
Position in BN refseq	Non-Wistar derived strains											Wistar derived strains												Wild rats				Feature
	BN/SsNHsdMCW	ACI/Eur	B	F344/DuCrl2Swe	F344/NHsd	F344xBNF1	FHH/Eur	L4	PVG/OlaHsd	SS/JrHsd/Mcwi	T2DN/Mcwi	BBDP/Rhw	BBDR/Rhw	GH/OmrMcwi	GK/Far	GK/KyoSwe	GK/Swe	Lew/Ztm	MHS/Gib	SHR/Mol	SHRSP	WK/Kyoto	WKY/NCrl	Wild/Cop	Wild/Mcwi	Wild/Swe	Wild/Tku
157	G	G	G	G	G	G	G	G	G	G	G	G	G	G	G	G	G	G	G	G	G	G	G	G	A	G	G	12S rRNA
158	C	C	C	C	C	C	C	C	C	C	C	C	C	C	C	C	C	C	C	C	C	C	C	C	T	C	C
453	A	A	A	A	A	A	A	A	A	A	A	A	A	A	A	A	A	A	A	A	A	A	A	G	A	A	A
648	A	C	C	C	C	C	C	C	C	C	C	C	C	C	C	C	C	C	C	C	C	C	C	C	C	A	C
935	G	A	A	A	A	A	A	A	A	A	A	G	G	G	G	G	G	G	G	G	G	G	G	G	G	G	A
942	T	C	C	C	C	C	C	C	C	C	C	T	T	T	T	T	T	T	T	T	T	T	T	T	T	T	T
979	A	A	A	A	A	A	A	A	A	A	A	A	A	A	A	A	A	A	A	A	A	A	A	A	G	A	A
1099	T	C	C	C	C	C	C	C	C	C	C	C	C	C	C	C	C	C	C	C	C	C	C	C	C	T	C	16S rRNA
1130	A	A	A	A	A	A	A	A	A	A	A	C	C	C	C	C	C	C	C	C	C	C	C	A	A	A	A
1136	C	-	-	-	-	-	-	-	-	-	-	C	C	C	C	C	C	C	C	C	C	C	C	-	-	C	-
1137	A	A	A	A	A	A	A	A	A	A	A	C	N	C	C	C	C	C	C	C	C	C	C	A	A	A	A
1137	-	-	-	-	-	-	-	-	-	-	-	C	N	C	-	C	C	-	C	C	C	C	C	-	-	-	-
1137.2	-	-	-	-	-	-	-	-	-	-	-	C	N	C	-	C	C	-	C	C	C	C	C	-	-	-	-
1137.3	-	-	-	-	-	-	-	-	-	-	-	C	N	C	C	C	C	-	C	C	C	C	C	-	-	-	-
1137.4	-	-	-	-	-	-	-	-	-	-	-	-	N	-	-	-	-	-	-	C	-	C	-	-	-	-	-
1158	T	T	T	T	T	T	T	T	T	T	T	T	N	T	T	T	T	T	T	T	T	T	T	T	T	C	T
1223	G	A	A	A	A	A	A	A	A	A	A	G	N	G	G	G	G	G	G	G	G	G	G	A	G	G	A
1248	T	C	C	C	C	C	C	C	C	C	C	T	N	T	T	T	T	T	T	T	T	T	T	T	T	T	C
1521	G	G	G	G	G	G	G	G	G	G	G	A	N	A	A	A	A	A	A	A	A	A	A	G	G	G	G
1585	T	T	T	T	T	T	T	T	T	T	T	C	C	C	C	C	C	T	C	C	C	C	C	C	T	T	T
1660.1	-	C	C	C	C	C	C	C	C	C	C	-	-	-	-	-	-	-	-	-	-	-	-	-	-	-	-
1660.2	-	A	A	A	A	A	A	A	A	A	A	-	-	-	-	-	-	-	-	-	-	-	-	-	-	-	-
1693	C	T	T	T	T	T	T	T	T	T	T	T	T	T	T	T	T	T	T	T	T	T	T	T	T	C	T
1716	T	T	T	T	T	T	T	T	T	T	T	C	C	C	C	C	C	T	C	C	C	C	C	C	T	T	T
1832	A	G	G	G	G	G	G	G	G	G	G	A	A	A	A	A	A	A	A	A	A	A	A	A	A	A	G
1918	G	A	A	A	A	A	A	A	A	A	A	A	A	A	A	A	A	A	A	A	A	A	A	A	A	A	A
2170	C	T	T	T	T	T	T	T	T	T	T	C	C	C	C	C	C	C	C	C	C	C	C	C	C	C	T
2596	T	T	T	T	T	T	T	T	T	T	T	T	T	T	T	T	T	T	T	T	T	T	T	T	C	T	T
2618.1	-	-	-	-	-	-	-	-	-	-	-	-	-	-	-	-	-	-	-	-	-	-	-	A	-	-	-
2648	T	-	-	-	-	-	-	-	-	-	-	-	-	-	-	-	-	-	-	-	-	-	-	-	-	T	-
5200	A	A	A	A	A	A	A	A	A	A	A	G	G	G	G	G	G	G	G	G	G	G	G	A	A	A	A	tRNA-Cys
5202	A	A	A	A	A	A	A	A	A	A	A	G	G	G	G	G	G	G	G	G	G	G	G	G	G	A	G
5237	T	T	T	T	T	T	T	T	T	T	T	A	A	A	A	A	A	A	A	A	A	A	A	T	T	T	T
5269	G	G	G	G	G	G	G	G	G	G	G	C	C	C	C	C	C	C	C	C	C	C	C	G	G	G	G	tRNA-Tyr
6978	G	G	G	G	G	G	G	G	G	G	G	A	A	A	A	A	A	A	A	A	A	A	A	G	G	G	G	tRNA-Asp
7003	T	T	T	T	T	T	T	T	T	T	T	T	T	T	T	T	T	T	T	T	T	T	T	T	C	T	T
15333	A	A	G	G	G	G	G	G	G	G	G	A	A	A	A	A	A	A	A	A	A	A	A	G	A	A	G	tRNA-Thr
15350	A	A	A	A	A	A	A	A	A	A	A	A	A	A	A	A	A	A	A	A	A	A	C	A	A	A	A	tRNA-Pro
15400	T	C	C	C	C	C	C	C	C	C	C	C	C	C	C	C	C	C	C	C	C	C	C	C	C	C	C
15460	C	C	C	C	C	C	C	C	C	C	C	C	C	C	T	T	T	C	C	T	T	T	T	C	T	C	C	D-loop
15507	T	C	C	C	C	C	C	C	C	C	C	C	C	C	C	C	C	C	C	C	C	C	C	C	C	T	C
15547	C	C	C	C	C	C	C	C	C	C	C	C	C	C	C	C	C	C	C	C	C	C	C	C	T	C	C
15549	T	C	C	C	C	C	C	C	C	C	C	T	T	T	T	T	T	T	T	T	T	T	T	C	C	T	C
15563	T	T	T	T	T	T	T	T	T	T	T	T	T	T	T	T	T	T	T	T	T	T	T	C	T	T	T
15565	C	C	C	C	C	C	C	C	C	C	C	C	C	C	C	C	C	C	C	C	C	T	T	C	C	C	C
15568	G	A	A	A	A	A	A	A	A	A	A	A	A	A	A	A	A	A	A	A	A	A	A	A	A	G	A
15579	A	G	G	G	G	G	G	G	G	G	G	G	G	G	G	G	G	G	G	G	G	G	G	G	G	A	G
15589	A	A	A	A	A	A	A	A	A	A	A	G	G	G	G	G	G	G	G	G	G	G	G	A	A	A	A
15616	G	G	G	G	G	G	G	G	G	G	G	G	G	G	G	G	G	G	G	G	G	G	G	A	A	G	G
15814	T	C	C	C	C	C	C	C	C	C	C	C	C	C	C	C	C	C	C	C	C	C	C	C	C	T	C
16024	A	A	A	A	A	A	A	A	A	A	A	A	A	A	A	A	A	A	A	A	A	A	A	A	G	A	A
16092.1	-	-	-	C	-	-	C	-	-	-	C	C	-	-	-	-	-	-	-	-	-	-	-	-	-	-	-
16164.1	-	-	-	-	-	-	-	-	-	-	-	-	-	-	-	-	-	-	-	-	-	-	T	-	-	-	-
16260	T	C	C	C	C	C	C	C	C	C	C	C	C	C	C	C	C	C	C	C	C	C	C	C	C	T	C
16269	A	A	A	A	A	A	A	A	A	A	A	A	A	A	A	A	A	A	A	A	A	A	A	A	A	A	G
16313	A	A	A	A	A	A	A	A	A	A	A	G	G	G	G	G	G	G	G	G	G	G	G	A	A	A	A
Wistar derived strains = the founder rats for strains in this group originated from the Wistar Institute, Philadelphia
Non-Wistar derived strains = the founder rats for strains within this group did not originate from the Wistar Institute, Philadelphia
Wild rats = wild caught rats
Nucleotides are coloured accordingly - A (green), T (red), G (black) and C (blue)
All the polymorphisms are numbered relative to the reference BN/SsNHsd/MCW sequence (NC_001665)
Insertions/Deletions are indicated with '-'
All insertions (relative to refseq) are designated position number of the preceeding nucleotide followed by a decimal indicating the number of insertions
Missing data are indicated with 'N'
Singletons in the wild rats are highlighted in yellow background
